# Supplementary material
Source: publisher figshare collection journal article supplement (https://gsapubs.figshare.com/ndownloader/files/34172142)
Supplement: Supplementary file 1 [file 34172142]

## Sheet: Table S4
TABLE S4: MAJOR AND TRACE ELEMENT DATA FOR Andrarum-3 SAMPLES
Analyte	SiO2		Al2O3		Fe2O3(T)		MnO		MgO		CaO		CaO*†	Na2O		K2O		TiO2		P2O5		Sum oxides	Na2O	CaO	K2O	Al2O3	CIA§	LOI	Total	Sc	Be	V	Ba	Sr	Y	Zr	Cr	Co	Ni	Cu	Zn	Ga	Ge	As	Rb	Nb	Mo	Ag	In
Unit	wt%	mol	wt%	mol	wt%	mol	wt%	mol	wt%	mol	wt%	mol	mol	wt%	mol	wt%	mol	wt%	mol	wt%	mol	mol	molar prop. ox.	molar prop. ox.	molar prop. ox.	molar prop. ox.	molar prop. ox.	wt %	wt %	ppm	ppm	ppm	ppm	ppm	ppm	ppm	ppm	ppm	ppm	ppm	ppm	ppm	ppm	ppm	ppm	ppm	ppm	ppm	ppm
A1517 11.0	48.72	0.810865	14.53	0.142505	6.64	0.0415813	0.068	0.000958597	1.47	0.0364728	3.02	0.0538545	0.00112941	0.07	0.00112941	4.13	0.0438452	0.799	0.0100044	0.1	0.000704508	0.18861	0.00598811	0.00598811	0.232466	0.755558	75.5558	20.14	99.7	15	4	324	907	81	38	134	70	26	60	140	< 30	21	< 1	41	158	14	36	< 0.5	< 0.2
A1517 12.00	51.4	0.855469	14.98	0.146919	6.69	0.0418945	0.016	0.000225552	0.89	0.0220822	0.38	0.0067764	0.00096807	0.06	0.00096807	4.31	0.0457561	0.821	0.0102798	0.09	0.000634057	0.194611	0.00497438	0.00497438	0.235116	0.754936	75.4936	18.94	98.59	13	4	294	536	34	27	149	70	24	50	140	< 30	23	< 1	53	161	14	50	0.6	< 0.2
A1517 13.09	48.01	0.799048	14.06	0.137896	7	0.0438358	0.064	0.000902209	1.24	0.0307662	3.26	0.0581344	0.00112941	0.07	0.00112941	4.12	0.0437391	0.763	0.00955362	0.08	0.000563607	0.183894	0.00614167	0.00614167	0.23785	0.749867	74.9867	19.26	97.93	15	4	243	746	84	30	125	60	26	50	150	< 30	21	< 1	41	160	13	35	0.5	< 0.2
A1517 14.00	51.31	0.853971	16.68	0.163592	5.37	0.0336283	0.013	0.000183261	0.93	0.0230746	0.26	0.00463648	0.00129076	0.08	0.00129076	4.62	0.0490472	0.853	0.0106805	0.1	0.000704508	0.215221	0.00599738	0.00599738	0.227893	0.760113	76.0113	19.29	99.5	13	4	388	772	32	25	156	80	28	70	150	< 30	23	< 1	41	178	16	53	0.7	< 0.2
A1517 14.98	45.84	0.762932	14.08	0.138092	7.21	0.0451508	0.053	0.000747142	1.56	0.0387058	2.28	0.0406584	0.000806725	0.05	0.000806725	4.08	0.0433144	0.757	0.00947849	0.14	0.000986311	0.18302	0.00440785	0.00440785	0.236665	0.754519	75.4519	22.83	98.88	15	4	340	663	64	33	128	70	32	60	160	< 30	21	< 1	38	152	12	67	0.5	< 0.2
A1517 16.03	49.08	0.816856	15.11	0.148194	7.07	0.0442741	0.052	0.000733045	1.46	0.0362247	1.98	0.0353086	0.000806725	0.05	0.000806725	4.23	0.0449068	0.819	0.0102548	0.16	0.00112721	0.194714	0.00414312	0.00414312	0.23063	0.761084	76.1084	18.49	98.49	17	4	380	603	72	40	137	70	28	60	150	< 30	22	< 1	44	161	13	73	0.5	< 0.2
A1517 17.46	49.21	0.81902	15.21	0.149175	6.76	0.0423328	0.025	0.000352425	0.94	0.0233227	0.46	0.00820301	0.00096807	0.06	0.00096807	4.53	0.0480917	0.839	0.0105052	0.07	0.000493156	0.199203	0.00485973	0.00485973	0.241421	0.748859	74.8859	20.53	98.65	15	4	284	706	47	25	145	80	31	70	150	< 30	24	< 1	60	182	16	79	0.6	< 0.2
A1517 19.24	49.63	0.82601	15.66	0.153588	7.1	0.044462	0.032	0.000451105	1.15	0.0285331	0.52	0.00927296	0.00112941	0.07	0.00112941	4.62	0.0490472	0.825	0.0103299	0.1	0.000704508	0.204894	0.00551219	0.00551219	0.239378	0.749597	74.9597	21.09	100.8	16	4	541	572	69	30	150	80	25	80	140	< 30	23	< 1	39	181	15	69	0.6	< 0.2
A1517 6.07	38.1	0.634112	11.84	0.116123	10.1	0.0632487	0.059	0.000831724	1.3	0.0322549	2.51	0.0447599	0.00112941	0.07	0.00112941	3.5	0.037157	0.653	0.0081763	0.5	0.00352254	0.155539	0.00726131	0.00726131	0.238892	0.746585	74.6585	29.58	98.21	14	5	1010	548	65	101	117	60	24	130	190	< 30	19	< 1	71	131	12	> 100	0.7	< 0.2
A1517 7.02	46.45	0.773084	14.19	0.139171	6.61	0.0413935	0.026	0.000366522	0.88	0.0218341	1.46	0.0260356	0.0014521	0.09	0.0014521	4.11	0.0436329	0.798	0.00999186	0.17	0.00119766	0.185708	0.00781929	0.00781929	0.234954	0.749407	74.9407	24.87	99.65	14	5	901	879	49	45	124	70	28	120	190	< 30	25	< 1	47	154	13	> 100	0.6	< 0.2
A1517 7.98	44.69	0.743792	13.77	0.135052	6.84	0.0428338	0.051	0.000718948	1	0.0248114	2.95	0.0526062	0.00129076	0.08	0.00129076	4.09	0.0434206	0.779	0.00975396	0.1	0.000704508	0.181054	0.00712915	0.00712915	0.239821	0.74592	74.592	23.73	98.07	15	5	855	983	79	44	127	80	33	140	150	< 30	24	< 1	63	159	14	> 100	0.5	< 0.2
A1517 8.39	46.2	0.768924	13.93	0.136621	8.53	0.053417	0.069	0.000972694	1.7	0.0421794	2.48	0.0442249	0.00112941	0.07	0.00112941	4.1	0.0435267	0.743	0.0093032	0.13	0.000915861	0.182406	0.00619175	0.00619175	0.238625	0.748992	74.8992	20.59	98.55	16	3	380	851	106	34	128	70	29	60	150	< 30	21	< 1	45	164	14	68	0.6	< 0.2
A1517 8.98	49.57	0.825012	15.51	0.152117	5.99	0.0375109	0.028	0.000394716	1	0.0248114	0.54	0.00962962	0.0014521	0.09	0.0014521	4.55	0.0483041	0.873	0.0109309	0.03	0.000211352	0.203325	0.00714178	0.00714178	0.23757	0.748146	74.8146	22.03	100.2	14	5	563	576	35	28	155	70	24	60	160	50	21	< 1	61	168	16	45	0.6	< 0.2
A1517 9.96	44.38	0.738633	13.25	0.129952	9.3	0.0582389	0.054	0.000761239	1.13	0.0280369	2.09	0.0372702	0.00112941	0.07	0.00112941	3.86	0.0409788	0.73	0.00914042	0.11	0.000774959	0.173189	0.00652127	0.00652127	0.236613	0.750345	75.0345	24.03	99.01	14	5	371	915	55	42	124	70	36	90	190	40	21	< 1	53	142	12	96	0.6	< 0.2
A1518 - 10.14	46.14	0.767925	13.89	0.136229	8.26	0.0517262	0.054	0.000761239	1.22	0.0302699	1.62	0.0288888	0.00064538	0.04	0.00064538	4.04	0.0428897	0.761	0.00952858	0.13	0.000915861	0.180409	0.00357731	0.00357731	0.237736	0.755109	75.5109	21.93	98.07	14	4	320	1284	56	37	138	70	28	70	170	30	22	< 1	67	163	15	50	0.7	< 0.2
A1518 - 10.16	47.05	0.78307	13.95	0.136817	6.68	0.0418318	0.056	0.000789433	1.18	0.0292775	2.26	0.0403017	0.00096807	0.06	0.00096807	4.04	0.0428897	0.771	0.00965379	0.1	0.000704508	0.181643	0.00532952	0.00532952	0.236121	0.75322	75.322	22.23	98.39	16	5	390	933	66	42	123	70	31	90	180	< 30	21	< 1	44	156	14	73	0.6	< 0.2
A1518 - 10.18	46.49	0.77375	13.94	0.136719	7.7	0.0482193	0.036	0.000507493	0.99	0.0245633	1.06	0.0189026	0.00112941	0.07	0.00112941	4.09	0.0434206	0.777	0.00972892	0.1	0.000704508	0.182398	0.00619202	0.00619202	0.238054	0.749562	74.9562	23.97	99.22	14	5	385	927	43	33	123	80	34	90	200	50	22	< 1	47	158	14	79	0.7	< 0.2
A1518 - 10.28	46.12	0.767592	14.1	0.138288	6.87	0.0430217	0.043	0.000606172	1	0.0248114	1.57	0.0279972	0.00112941	0.07	0.00112941	4.11	0.0436329	0.782	0.00979152	0.08	0.000563607	0.18418	0.00613213	0.00613213	0.236904	0.750832	75.0832	23.62	98.36	15	5	394	911	54	37	116	60	27	60	150	< 30	21	< 1	41	142	12	52	< 0.5	< 0.2
A1518 - 10.32	43.2	0.718993	13.21	0.129559	9.16	0.0573622	0.034	0.000479299	0.83	0.0205935	1.33	0.0237174	0.00112941	0.07	0.00112941	3.9	0.0414035	0.722	0.00904026	0.09	0.000634057	0.173222	0.00652006	0.00652006	0.23902	0.74794	74.794	25.64	98.18	15	4	385	909	49	33	119	60	36	70	200	100	25	< 1	51	149	13	69	0.6	< 0.2
A1518 - 10.33	44.82	0.745956	13.57	0.13309	6.92	0.0433348	0.102	0.0014379	1.92	0.047638	3.96	0.0706172	0.00112941	0.07	0.00112941	3.98	0.0422528	0.76	0.00951606	0.08	0.000563607	0.177602	0.00635926	0.00635926	0.237907	0.749374	74.9374	22.61	98.77	18	5	374	848	88	38	123	70	30	70	160	230	22	< 1	39	160	16	71	0.5	0.2
A1518 - 10.36	45.63	0.759437	14.39	0.141132	7.62	0.0477183	0.035	0.000493396	0.97	0.0240671	0.86	0.0153361	0.00129076	0.08	0.00129076	4.14	0.0439514	0.797	0.00997934	0.07	0.000493156	0.187665	0.00687799	0.00687799	0.234201	0.752043	75.2043	24.08	98.68	14	5	385	1031	41	29	133	60	31	50	170	30	21	< 1	37	146	13	79	0.6	< 0.2
A1518 - 10.39	44.82	0.745956	14.17	0.138975	8.82	0.055233	0.037	0.00052159	0.99	0.0245633	0.93	0.0165843	0.00112941	0.07	0.00112941	4	0.0424651	0.783	0.00980404	0.1	0.000704508	0.183699	0.00614819	0.00614819	0.231167	0.756536	75.6536	23.59	98.29	15	4	334	1036	47	34	120	60	36	80	190	< 30	24	< 1	51	153	14	56	0.5	< 0.2
A1518 - 10.43	47.53	0.791059	14.1	0.138288	7.23	0.0452761	0.054	0.000761239	1.39	0.0344879	1.86	0.0331687	0.00112941	0.07	0.00112941	4.15	0.0440575	0.777	0.00972892	0.08	0.000563607	0.184605	0.00611802	0.00611802	0.238659	0.749105	74.9105	21.13	98.37	15	4	291	1022	58	29	123	60	26	60	150	< 30	20	< 1	45	157	15	43	0.5	< 0.2
A1518 - 10.5	44.68	0.743626	13.51	0.132502	8.35	0.0522898	0.028	0.000394716	0.81	0.0200973	0.91	0.0162277	0.00096807	0.06	0.00096807	3.91	0.0415096	0.758	0.00949102	0.09	0.000634057	0.175947	0.00550204	0.00550204	0.235921	0.753075	75.3075	25.03	98.13	12	4	315	866	40	31	116	60	33	60	180	< 30	22	< 1	47	152	13	48	0.5	< 0.2
A1518 10.54	48.75	0.811364	15.54	0.152411	6.44	0.0403289	0.053	0.000747142	1.15	0.0285331	1.94	0.0345953	0.00112941	0.07	0.00112941	4.29	0.0455438	0.86	0.0107682	0.09	0.000634057	0.200214	0.00564104	0.00564104	0.227476	0.761242	76.1242	19.28	98.47	15	5	310	1127	61	37	134	70	26	40	130	< 30	21	< 1	38	168	15	48	0.5	< 0.2
A15X - 10.01	43.48	0.723654	13.07	0.128186	9.96	0.062372	0.054	0.000761239	1.23	0.0305181	1.62	0.0288888	0.00112941	0.07	0.00112941	3.79	0.0402357	0.745	0.00932824	0.11	0.000774959	0.170681	0.00661712	0.00661712	0.235736	0.751029	75.1029	25.01	99.13	14	4	382	978	51	42	122	70	37	100	220	< 30	20	< 1	74	142	13	96	0.7	< 0.2
A15X - 11.30	47.13	0.784402	14.1	0.138288	6.19	0.0387633	0.058	0.000817627	1.4	0.034736	1.86	0.0331687	0.00096807	0.06	0.00096807	4.04	0.0428897	0.768	0.00961623	0.13	0.000915861	0.183114	0.0052867	0.0052867	0.234224	0.755202	75.5202	23.06	98.79	16	4	319	670	58	37	128	70	28	70	170	60	22	< 1	38	170	15	32	0.6	< 0.2
A15X - 11.60	45.64	0.759603	13.68	0.134169	6.9	0.0432095	0.044	0.000620269	1.15	0.0285331	1.49	0.0265706	0.00112941	0.07	0.00112941	3.83	0.0406603	0.717	0.00897765	0.09	0.000634057	0.177088	0.0063777	0.0063777	0.229605	0.75764	75.764	24.96	98.58	12	4	271	480	45	26	118	70	27	60	160	50	21	< 1	38	148	13	41	0.5	< 0.2
A15X - 12.40	49.33	0.821017	14.37	0.140936	6.14	0.0384502	0.05	0.000704851	1.41	0.0349841	1.77	0.0315637	0.00096807	0.06	0.00096807	4.21	0.0446945	0.799	0.0100044	0.11	0.000774959	0.187567	0.0051612	0.0051612	0.238286	0.751392	75.1392	20.88	99.15	16	4	286	669	53	31	132	70	27	60	160	170	21	< 1	36	166	14	33	0.6	< 0.2
A15X - 12.79	41.97	0.698522	12.12	0.118869	8.72	0.0546068	0.036	0.000507493	0.98	0.0243152	1.31	0.0233607	0.000806725	0.05	0.000806725	3.45	0.0366261	0.666	0.00833907	0.06	0.000422705	0.157109	0.00513482	0.00513482	0.233126	0.756604	75.6604	28.78	98.16	11	3	236	675	45	26	123	60	35	70	140	50	18	< 1	53	141	14	35	0.5	< 0.2
A15X - 13.40	44.05	0.73314	11.85	0.116221	6.82	0.0427085	0.047	0.00066256	0.88	0.0218341	2.86	0.0510013	0.00096807	0.06	0.00096807	3.38	0.035883	0.645	0.00807613	0.08	0.000563607	0.15404	0.00628453	0.00628453	0.232946	0.754485	75.4485	27.97	98.65	12	3	201	1112	66	22	110	60	30	60	140	50	18	< 1	41	135	12	33	< 0.5	< 0.2
A15X - 13.80	51.22	0.852473	15.24	0.149469	6.53	0.0408925	0.038	0.000535687	1.03	0.0255558	1.36	0.0242524	0.00096807	0.06	0.00096807	4.27	0.0453315	0.832	0.0104176	0.09	0.000634057	0.196737	0.00492064	0.00492064	0.230417	0.759741	75.9741	19.4	100.1	16	4	262	710	50	25	135	70	25	50	140	< 30	21	< 1	36	166	15	48	0.5	< 0.2
A15X - 7.50	42.71	0.710838	13.11	0.128579	9.18	0.0574875	0.068	0.000958597	1.49	0.036969	3.05	0.0543895	0.00112941	0.07	0.00112941	3.79	0.0402357	0.713	0.00892757	0.13	0.000915861	0.171073	0.00660194	0.00660194	0.235196	0.7516	75.16	24.15	98.47	17	5	827	967	70	47	109	60	23	90	120	< 30	20	< 1	101	137	10	90	< 0.5	< 0.2
†CaO* means the CaO in silicate minerals and is obtained by excluding carbonate and phosphate-CaO contents using the procedures outlined in McLennan (1993).
§CIA was calculated based on molar proportions of oxides.
[truncated: 28 more columns]

## Sheet: G49833
Rooney, A.D., Milikin, A.E.G., and Ahlberg, P., 2022, Re-Os geochronology for the Cambrian SPICE event: Insights into euxinia and enhanced continental weathering from radiogenic isotopes: Geology, v. 50, https://doi.org/10.1130/G49833.1
